# Supplementary material
Source: PubMed Central journal article supplement (PMC5643249)
Supplement: NIHMS908742-supplement-1.pdf [file NIHMS908742-supplement-1.pdf]

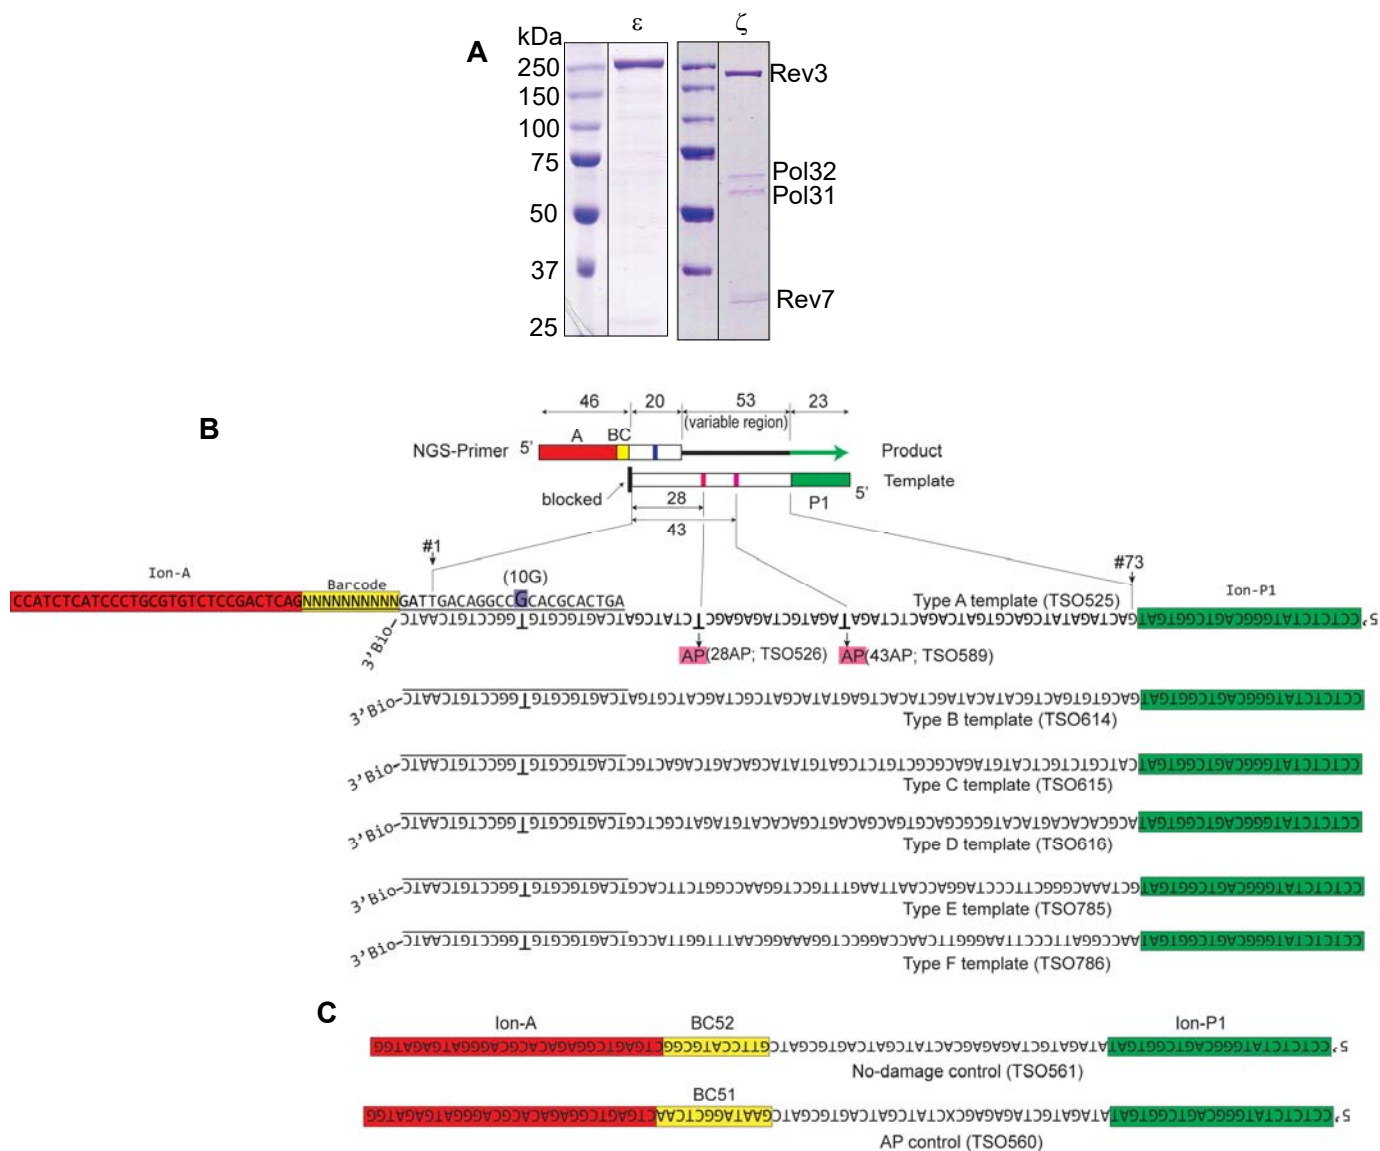

**Figure S1. (A)** Proteins purified for this study. Pol  $\epsilon$  (0.84  $\mu\text{g}$ ) and four-subunits complex of Pol  $\zeta$  (0.39  $\mu\text{g}$  of Rev3) were separated by SDS-PAGE and stained by coomassie brilliant blue R250. **(B)** NGS substrates. Type A to Type F templates share the Ion-P1 adaptor (green box) and primer-binding site (underlined), but have different sequences between them (from #21 to #73 in the Figure). The variable regions in type A –D templates were excluding repeated nucleotides, and type E and F contain homodimers (like AA). **(C)** Control oligonucleotides that have two adaptors. TSO560 has an abasic site at the position indicated by “X”.

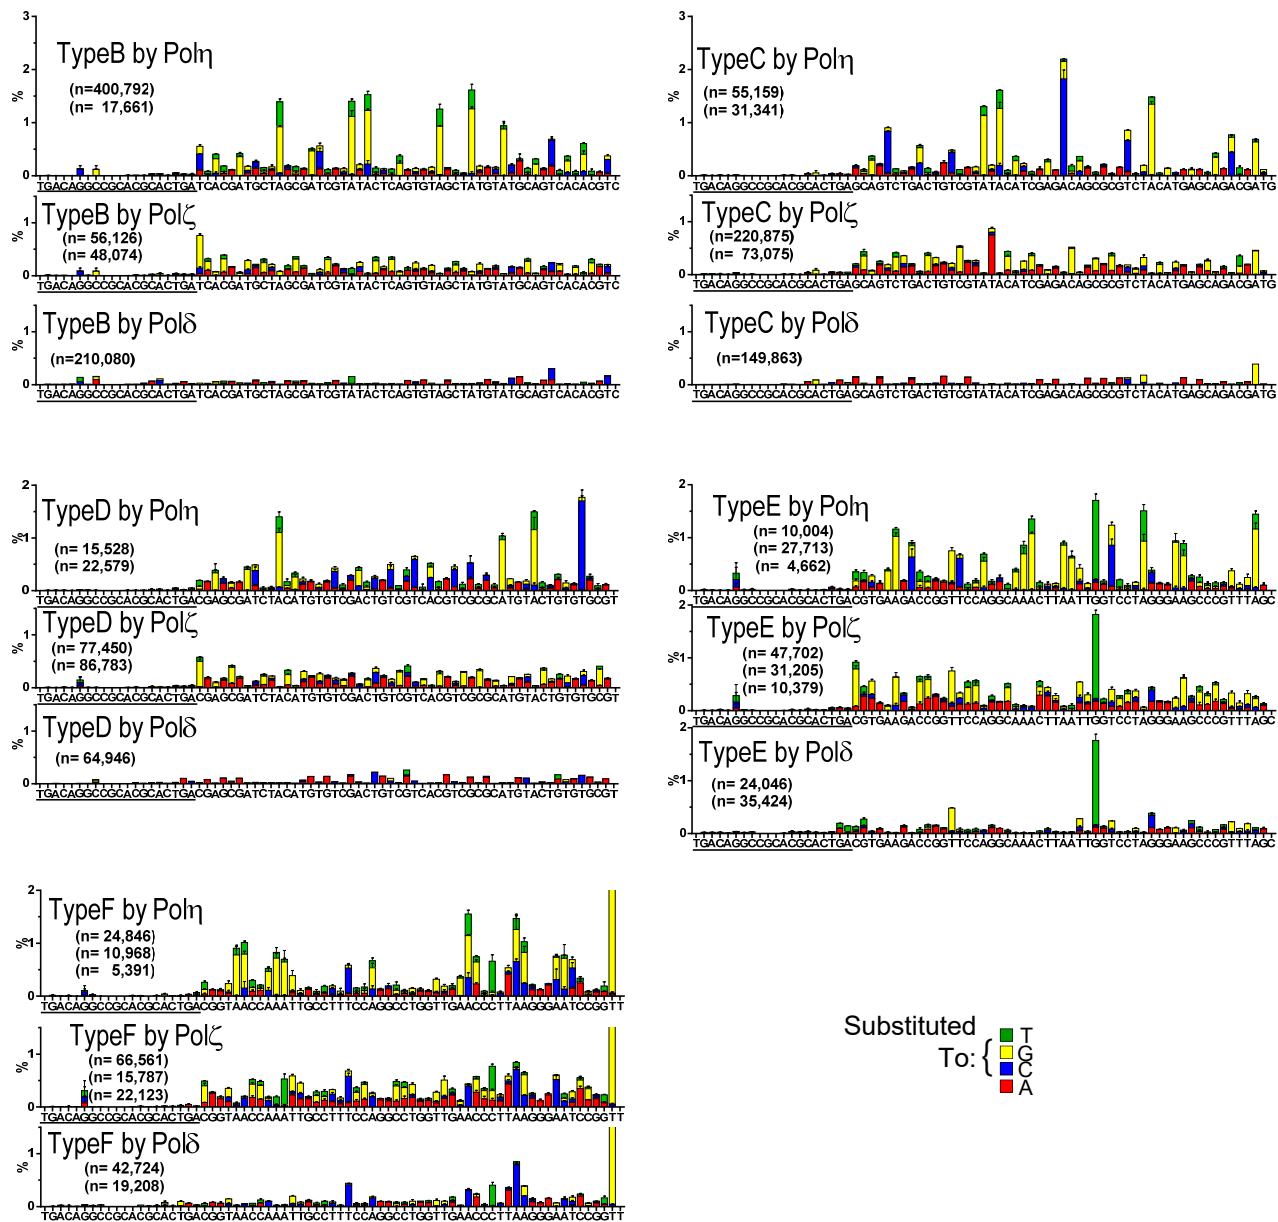

**Figure S2.** Same experiments as in Figure 2 were repeated with five undamaged templates (Type B to F) by indicated polymerases. Error bars are SD (n=2 to 3).

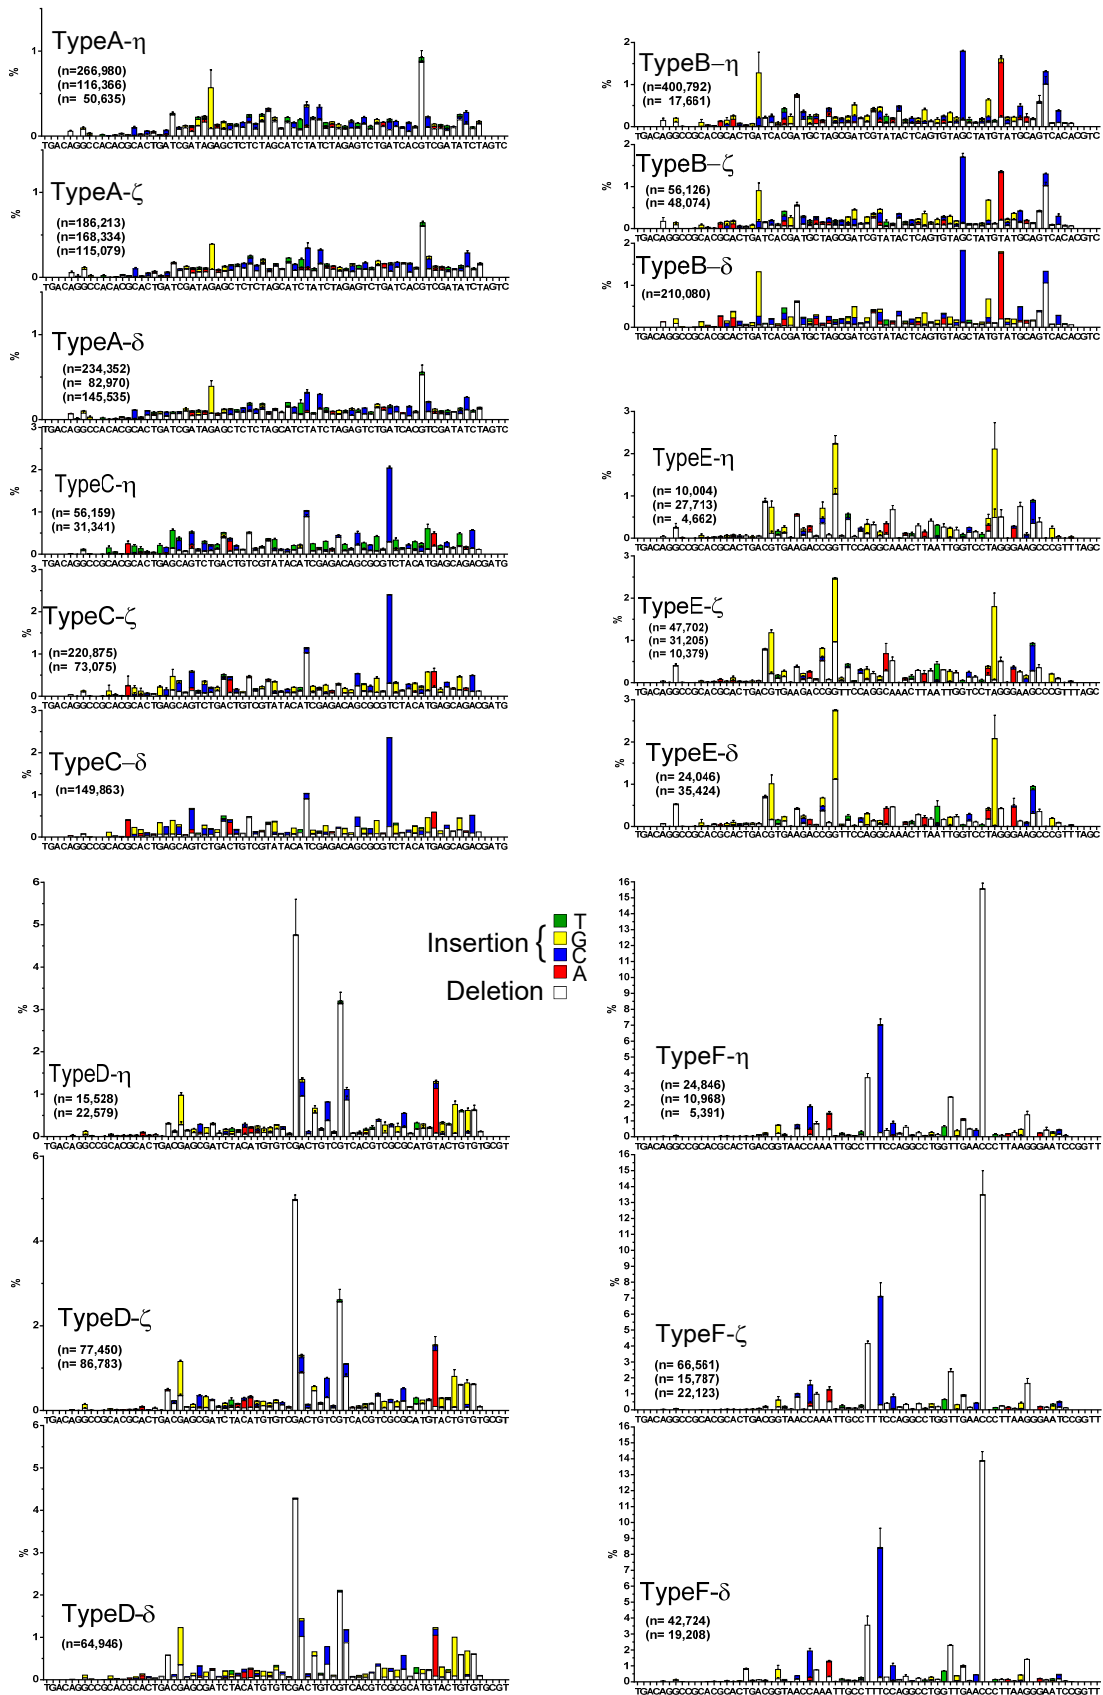

**Figure S3.** Rates of single nucleotide insertions and deletions on six undamaged templates (type A-F) by Pol $\eta$ , Pol $\zeta$ , and Pol $\delta$ . For insertions, positions of colored bars indicate the positions after which insertions were observed.

**Table S1. Synthetic DNA oligos.** Type-A to F templates have same sequences except for the internal 53-nt region (variable region; Figure 1A and Figure S1B). Ion Torrent primers have same sequences except for the barcode (BC).

| Name   | Sequence (5'-3')                                                                                                     | Use                                                       | Source |
|--------|----------------------------------------------------------------------------------------------------------------------|-----------------------------------------------------------|--------|
| TSO525 | CCTCTCTATGGGCAGTCGGTGATGACTAGATATCGACGT<br>GATCAGACTCTAGATAGATGCTAGAGAGCTCTATCGATC<br>AGTGCGTGTGGCCTGTCAATC/3Bio/    | Template (Type-A)<br>3'-Biotin<br>Undamaged               | IDT    |
| TSO526 | CCTCTCTATGGGCAGTCGGTGATGACTAGATATCGACGT<br>GATCAGACTCTAGATAGATGCTAGAGAGCXCTATCGATC<br>AGTGCGTGTGGCCTGTCAATC/3Bio/    | Template (Type-A)<br>3'-Biotin<br>28AP (indicated as "X") | IDT    |
| TSO589 | CCTCTCTATGGGCAGTCGGTGATGACTAGATATCGACGT<br>GATCAGACTCTAGAXAGATGCTAGAGAGCTCTATCGATC<br>AGTGCGTGTGGCCTGTCAATC/3Bio/    | Template (Type-A)<br>3'-Biotin<br>43AP (indicated as "X") | IDT    |
| TSO614 | CCTCTCTATGGGCAGTCGGTGATGACGTGTGACTGCATA<br>CATAGCTACACTGAGTATACGATCGCTAGCATCGTGATC<br>AGTGCGTGTGGCCTGTCAATC/3Bio/    | Template (Type-B)<br>3'-Biotin<br>Undamaged               | IDT    |
| TSO615 | CCTCTCTATGGGCAGTCGGTGATCATCGTCTGCTCATGT<br>AGACGCGCTGTCTCGATGTATACGACAGTCAGACTGCTC<br>AGTGCGTGTGGCCTGTCAATC/3Bio/    | Template (Type-C)<br>3'-Biotin<br>Undamaged               | IDT    |
| TSO616 | CCTCTCTATGGGCAGTCGGTGATACGCACACAGTACATG<br>CGCGACGTGACGACAGTCGACACATGTAGATCGCTCGTC<br>AGTGCGTGTGGCCTGTCAATC/3Bio/    | Template (Type-D)<br>3'-Biotin<br>Undamaged               | IDT    |
| TSO785 | CCTCTCTATGGGCAGTCGGTGATGCTAAACGGGCTTCCC<br>TAGGACCAATTAAGTTTGCCTGGAACCGGTCTTCACGTC<br>AGTGCGTGTGGCCTGTCAATC[ BtnTg ] | Template (Type-E)<br>3'-Biotin<br>Undamaged               | Sigma  |
| TSO786 | CCTCTCTATGGGCAGTCGGTGATAACCGGATTCCCTTAA<br>GGGTTCAACCAGGCCTGGAAGGCAATTTGGTTACCGTC<br>AGTGCGTGTGGCCTGTCAATC[ BtnTg ]  | Template (Type-F)<br>3'-Biotin<br>Undamaged               | Sigma  |
| TSO590 | GGTAAGGTAACGATTGACAGGCCACACGCACTGA                                                                                   | Primer<br>for Gel assay                                   | Fisher |
| TSO686 | CCATCTCATCCCTGCGTGTCTCCGACTCAGTAAGGAGAA<br>CGATTGACAGGCCGCACGCACTGA                                                  | Primer<br>For IonTorrent (BC2)                            | Fisher |
| TSO687 | CCATCTCATCCCTGCGTGTCTCCGACTCAGAAGAGGATT<br>CGATTGACAGGCCGCACGCACTGA                                                  | Primer<br>For IonTorrent (BC3)                            | Fisher |
| TSO688 | CCATCTCATCCCTGCGTGTCTCCGACTCAGTACCAAGAT<br>CGATTGACAGGCCGCACGCACTGA                                                  | Primer<br>For IonTorrent (BC4)                            | Fisher |
| TSO689 | CCATCTCATCCCTGCGTGTCTCCGACTCAGCAGAAGGAA<br>CGATTGACAGGCCGCACGCACTGA                                                  | Primer<br>For IonTorrent (BC5)                            | Fisher |
| TSO690 | CCATCTCATCCCTGCGTGTCTCCGACTCAGCTGCAAGTT<br>CGATTGACAGGCCGCACGCACTGA                                                  | Primer<br>For IonTorrent (BC6)                            | Fisher |
| TSO691 | CCATCTCATCCCTGCGTGTCTCCGACTCAGTTCGTGATT<br>CGATTGACAGGCCGCACGCACTGA                                                  | Primer<br>For IonTorrent (BC7)                            | Fisher |
| TSO692 | CCATCTCATCCCTGCGTGTCTCCGACTCAGTTCGGATAA<br>CGATTGACAGGCCGCACGCACTGA                                                  | Primer<br>For IonTorrent (BC8)                            | Fisher |
| TSO693 | CCATCTCATCCCTGCGTGTCTCCGACTCAGTGAGCGGAA<br>CGATTGACAGGCCGCACGCACTGA                                                  | Primer<br>For IonTorrent (BC9)                            | Fisher |
| TSO694 | CCATCTCATCCCTGCGTGTCTCCGACTCAGCTGACCGAA<br>CGATTGACAGGCCGCACGCACTGA                                                  | Primer<br>For IonTorrent (BC10)                           | Fisher |

|        |                                                                       |                                 |        |
|--------|-----------------------------------------------------------------------|---------------------------------|--------|
| TSO695 | CCATCTCATCCCTGCGTGTCTCCGACTCAGTCCTCGAAT<br>CGATTGACAGGCCGCACGCACTGA   | Primer<br>For IonTorrent (BC11) | Fisher |
| TSO696 | CCATCTCATCCCTGCGTGTCTCCGACTCAGTAGGTGGTT<br>CGATTGACAGGCCGCACGCACTGA   | Primer<br>For IonTorrent (BC12) | Fisher |
| TSO697 | CCATCTCATCCCTGCGTGTCTCCGACTCAGTCTAACGGA<br>CGATTGACAGGCCGCACGCACTGA   | Primer<br>For IonTorrent (BC13) | Fisher |
| TSO698 | CCATCTCATCCCTGCGTGTCTCCGACTCAGTTGGAGTGT<br>CGATTGACAGGCCGCACGCACTGA   | Primer<br>For IonTorrent (BC14) | Fisher |
| TSO699 | CCATCTCATCCCTGCGTGTCTCCGACTCAGTCTAGAGGT<br>CGATTGACAGGCCGCACGCACTGA   | Primer<br>For IonTorrent (BC15) | Fisher |
| TSO700 | CCATCTCATCCCTGCGTGTCTCCGACTCAGTCTGGATGA<br>CGATTGACAGGCCGCACGCACTGA   | Primer<br>For IonTorrent (BC16) | Fisher |
| TSO701 | CCATCTCATCCCTGCGTGTCTCCGACTCAGTCTATTCTGT<br>CGATTGACAGGCCGCACGCACTGA  | Primer<br>For IonTorrent (BC17) | Fisher |
| TSO702 | CCATCTCATCCCTGCGTGTCTCCGACTCAGAGGCAATTG<br>CGATTGACAGGCCGCACGCACTGA   | Primer<br>For IonTorrent (BC18) | Fisher |
| TSO703 | CCATCTCATCCCTGCGTGTCTCCGACTCAGTTAGTCGGA<br>CGATTGACAGGCCGCACGCACTGA   | Primer<br>For IonTorrent (BC19) | Fisher |
| TSO704 | CCATCTCATCCCTGCGTGTCTCCGACTCAGCAGATCCAT<br>CGATTGACAGGCCGCACGCACTGA   | Primer<br>For IonTorrent (BC20) | Fisher |
| TSO705 | CCATCTCATCCCTGCGTGTCTCCGACTCAGTCGCAATTA<br>CGATTGACAGGCCGCACGCACTGA   | Primer<br>For IonTorrent (BC21) | Fisher |
| TSO706 | CCATCTCATCCCTGCGTGTCTCCGACTCAGTTGAGACG<br>CGATTGACAGGCCGCACGCACTGA    | Primer<br>For IonTorrent (BC22) | Fisher |
| TSO707 | CCATCTCATCCCTGCGTGTCTCCGACTCAGTGCCACGAA<br>CGATTGACAGGCCGCACGCACTGA   | Primer<br>For IonTorrent (BC23) | Fisher |
| TSO708 | CCATCTCATCCCTGCGTGTCTCCGACTCAGAACCCTCATT<br>CGATTGACAGGCCGCACGCACTGA  | Primer<br>For IonTorrent (BC24) | Fisher |
| TSO709 | CCATCTCATCCCTGCGTGTCTCCGACTCAGCCTGAGATA<br>CGATTGACAGGCCGCACGCACTGA   | Primer<br>For IonTorrent (BC25) | Fisher |
| TSO710 | CCATCTCATCCCTGCGTGTCTCCGACTCAGTTACAACCT<br>CGATTGACAGGCCGCACGCACTGA   | Primer<br>For IonTorrent (BC26) | Fisher |
| TSO711 | CCATCTCATCCCTGCGTGTCTCCGACTCAGAACCATCCG<br>CGATTGACAGGCCGCACGCACTGA   | Primer<br>For IonTorrent (BC27) | Fisher |
| TSO712 | CCATCTCATCCCTGCGTGTCTCCGACTCAGATCCGGAAT<br>CGATTGACAGGCCGCACGCACTGA   | Primer<br>For IonTorrent (BC28) | Fisher |
| TSO713 | CCATCTCATCCCTGCGTGTCTCCGACTCAGTCGACCACT<br>CGATTGACAGGCCGCACGCACTGA   | Primer<br>For IonTorrent (BC29) | Fisher |
| TSO714 | CCATCTCATCCCTGCGTGTCTCCGACTCAGCGAGGTTAT<br>CGATTGACAGGCCGCACGCACTGA   | Primer<br>For IonTorrent (BC30) | Fisher |
| TSO715 | CCATCTCATCCCTGCGTGTCTCCGACTCAGTCCAAGCTG<br>CGATTGACAGGCCGCACGCACTGA   | Primer<br>For IonTorrent (BC31) | Fisher |
| TSO716 | CCATCTCATCCCTGCGTGTCTCCGACTCAGTCTTACACA<br>CGATTGACAGGCCGCACGCACTGA   | Primer<br>For IonTorrent (BC32) | Fisher |
| TSO717 | CCATCTCATCCCTGCGTGTCTCCGACTCAGTTCTCATTG<br>AACGATTGACAGGCCGCACGCACTGA | Primer<br>For IonTorrent (BC33) | Fisher |
| TSO718 | CCATCTCATCCCTGCGTGTCTCCGACTCAGTCGCATCGT<br>TCGATTGACAGGCCGCACGCACTGA  | Primer<br>For IonTorrent (BC34) | Fisher |
| TSO719 | CCATCTCATCCCTGCGTGTCTCCGACTCAGTAAGCCATT<br>GTCGATTGACAGGCCGCACGCACTGA | Primer<br>For IonTorrent (BC35) | Fisher |

|        |                                                                                                             |                                                                       |        |
|--------|-------------------------------------------------------------------------------------------------------------|-----------------------------------------------------------------------|--------|
| TSO720 | CCATCTCATCCCTGCGTGTCTCCGACTCAGAAGGAATCG<br>TCGATTGACAGGCCGCACGCACTGA                                        | Primer<br>For IonTorrent (BC36)                                       | Fisher |
| TSO721 | CCATCTCATCCCTGCGTGTCTCCGACTCAGCTTGAGAAT<br>GTCGATTGACAGGCCGCACGCACTGA                                       | Primer<br>For IonTorrent (BC37)                                       | Fisher |
| TSO722 | CCATCTCATCCCTGCGTGTCTCCGACTCAGTGGAGGACG<br>GACGATTGACAGGCCGCACGCACTGA                                       | Primer<br>For IonTorrent (BC38)                                       | Fisher |
| TSO723 | CCATCTCATCCCTGCGTGTCTCCGACTCAGTAACAATCG<br>GCGATTGACAGGCCGCACGCACTGA                                        | Primer<br>For IonTorrent (BC39)                                       | Fisher |
| TSO724 | CCATCTCATCCCTGCGTGTCTCCGACTCAGCTGACATAA<br>TCGATTGACAGGCCGCACGCACTGA                                        | Primer<br>For IonTorrent (BC40)                                       | Fisher |
| TSO725 | CCATCTCATCCCTGCGTGTCTCCGACTCAGTTCCAATT<br>GCGATTGACAGGCCGCACGCACTGA                                         | Primer<br>For IonTorrent (BC41)                                       | Fisher |
| TSO726 | CCATCTCATCCCTGCGTGTCTCCGACTCAGAGCACGAAT<br>CGATTGACAGGCCGCACGCACTGA                                         | Primer<br>For IonTorrent (BC42)                                       | Fisher |
| TSO727 | CCATCTCATCCCTGCGTGTCTCCGACTCAGCTTGACACC<br>GCGATTGACAGGCCGCACGCACTGA                                        | Primer<br>For IonTorrent (BC43)                                       | Fisher |
| TSO728 | CCATCTCATCCCTGCGTGTCTCCGACTCAGTTGGAGGCC<br>AGCGATTGACAGGCCGCACGCACTGA                                       | Primer<br>For IonTorrent (BC44)                                       | Fisher |
| TSO729 | CCATCTCATCCCTGCGTGTCTCCGACTCAGTGGAGCTTC<br>CTCGATTGACAGGCCGCACGCACTGA                                       | Primer<br>For IonTorrent (BC45)                                       | Fisher |
| TSO730 | CCATCTCATCCCTGCGTGTCTCCGACTCAGTCAGTCCGA<br>ACGATTGACAGGCCGCACGCACTGA                                        | Primer<br>For IonTorrent (BC46)                                       | Fisher |
| TSO731 | CCATCTCATCCCTGCGTGTCTCCGACTCAGTAAGGCAAC<br>CACGATTGACAGGCCGCACGCACTGA                                       | Primer<br>For IonTorrent (BC47)                                       | Fisher |
| TSO732 | CCATCTCATCCCTGCGTGTCTCCGACTCAGTTCTAAGAG<br>ACGATTGACAGGCCGCACGCACTGA                                        | Primer<br>For IonTorrent (BC48)                                       | Fisher |
| TSO733 | CCATCTCATCCCTGCGTGTCTCCGACTCAGTCCTAACAT<br>AACGATTGACAGGCCGCACGCACTGA                                       | Primer<br>For IonTorrent (BC49)                                       | Fisher |
| TSO734 | CCATCTCATCCCTGCGTGTCTCCGACTCAGCGGACAATG<br>GCGATTGACAGGCCGCACGCACTGA                                        | Primer<br>For IonTorrent (BC50)                                       | Fisher |
| TSO584 | CCATCTCATCCCTGCGTGTCTCCGACTCAGTCTAGCTCT<br>TCGATTGACAGGCCGCACGCACTGA                                        | Primer<br>For IonTorrent (BC60)                                       | Fisher |
| TSO585 | CCATCTCATCCCTGCGTGTCTCCGACTCAGTCACTCGGA<br>TCGATTGACAGGCCGCACGCACTGA                                        | Primer<br>For IonTorrent (BC61)                                       | Fisher |
| TSO586 | CCATCTCATCCCTGCGTGTCTCCGACTCAGTTCTGCTT<br>CACGATTGACAGGCCGCACGCACTGA                                        | Primer<br>For IonTorrent (BC62)                                       | Fisher |
| TSO587 | CCATCTCATCCCTGCGTGTCTCCGACTCAGCCTTAGAGT<br>TCGATTGACAGGCCGCACGCACTGA                                        | Primer<br>For IonTorrent (BC63)                                       | Fisher |
| TSO588 | CCATCTCATCCCTGCGTGTCTCCGACTCAGCTGAGTTCC<br>GACGATTGACAGGCCGCACGCACTGA                                       | Primer<br>For IonTorrent (BC64)                                       | Fisher |
| TSO560 | CCTCTCTATGGGCAGTCGGTGATATAGATGCTAGAGAGC<br>XCTATCGATCAGTGCATCGAATAGGCTCAA<br>CTGAGTCGGAGACACGCAGGGATGAGATGG | Control Oligo (with AP;<br>indicated as "X")<br>For IonTorrent (BC51) | IDT    |
| TSO561 | CCTCTCTATGGGCAGTCGGTGATATAGATGCTAGAGAGC<br>ACTATCGATCAGTGCATCGTTCCATGCGGCTGA<br>GTCGGAGACACGCAGGGATGAGATGG  | Control Oligo (w/o<br>damage)<br>For IonTorrent (BC52)                | IDT    |

**Table S2. Summary of NGS analysis for abasic and undamaged type A templates.**

| Polymerase           | No-damage (Type A) |                    |                | 28AP (Type A) |                    |                | 43AP (Type A) |                    |                |
|----------------------|--------------------|--------------------|----------------|---------------|--------------------|----------------|---------------|--------------------|----------------|
|                      | Barcode#           | Qualified Read (N) | N with 10G (n) | Barcode#      | Qualified Read (N) | N with 10G (n) | Barcode#      | Qualified Read (N) | N with 10G (n) |
| Pol $\eta$           | 4                  | 267,526            | 266,980        | 22            | 47,644             | 47,542         | 40            | 19,002             | 18,934         |
| Pol $\eta$           | 10                 | 116,744            | 116,366        | 28            | 48,137             | 48,046         | 46            | 5,964              | 5,946          |
| Pol $\eta$           | 16                 | 50,819             | 50,635         | 34            | 61,912             | 61,777         | 61            | 2,516              | 2,504          |
| Pol $\zeta$          | 5                  | 186,716            | 186,213        | 23            | 216,448            | 216,014        | 41            | 155,208            | 154,919        |
| Pol $\zeta$          | 11                 | 168,710            | 168,334        | 29            | 217,182            | 216,751        | 47            | 114,956            | 114,727        |
| Pol $\zeta$          | 17                 | 115,375            | 115,079        | 35            | 250,922            | 250,492        | 62            | 19,544             | 19,455         |
| Pol $\eta$ + $\zeta$ | 6                  | 123,736            | 123,458        | 24            | 78,384             | 78,248         | 42            | 100,393            | 100,176        |
| Pol $\eta$ + $\zeta$ | 12                 | 97,916             | 97,710         | 30            | 136,187            | 135,922        | 48            | 235,405            | 234,770        |
| Pol $\eta$ + $\zeta$ | 18                 | 123,360            | 123,126        | 36            | 130,582            | 130,362        | 63            | 30,027             | 29,893         |
| No Pol               | 7                  | 2,594              | 2,578          | 25            | 2,258              | 2,245          | 43            | 1,224              | 1,210          |
| No Pol               | 13                 | 1,318              | 1,310          | 31            | 2,775              | 2,757          | 49            | 2,618              | 2,600          |
| No Pol               | 19                 | 2,262              | 2,242          | 37            | 1,823              | 1,816          | 64            | 555                | 550            |
| Pol $\delta$         | 2                  | 235,223            | 234,352        |               |                    |                |               |                    |                |
| Pol $\delta$         | 8                  | 83,650             | 82,970         |               |                    |                |               |                    |                |
| Pol $\delta$         | 14                 | 145,990            | 145,535        |               |                    |                |               |                    |                |
| Pol $\epsilon$       | 3                  | 235,366            | 234,284        |               |                    |                |               |                    |                |
| Pol $\epsilon$       | 9                  | 167,361            | 166,884        |               |                    |                |               |                    |                |
| Pol $\epsilon$       | 15                 | 115,814            | 115,497        |               |                    |                |               |                    |                |

| Control oligo without damage, no polymerase |          |                    |                |
|---------------------------------------------|----------|--------------------|----------------|
|                                             | Barcode# | Qualified Read (N) | N with 10G (n) |
| No Pol                                      | 52       | 69,892             | NA             |

| Control oligo with AP, no polymerase |          |                    |                |
|--------------------------------------|----------|--------------------|----------------|
|                                      | Barcode# | Qualified Read (N) | N with 10G (n) |
| No Pol                               | 51       | 1,541              | NA             |

Table S3. Summary of NGS analysis with type B to F templates.

|              | No-damage (Type B) |                    |                | No-damage (Type C) |                    |                | No-damage (Type D) |                    |                | No-damage (Type E) |                    |                | No-damage (Type F) |                    |                |
|--------------|--------------------|--------------------|----------------|--------------------|--------------------|----------------|--------------------|--------------------|----------------|--------------------|--------------------|----------------|--------------------|--------------------|----------------|
|              | Barcode#           | Qualified Read (N) | N with 10G (n) | Barcode#           | Qualified Read (N) | N with 10G (n) | Barcode#           | Qualified Read (N) | N with 10G (n) | Barcode#           | Qualified Read (N) | N with 10G (n) | Barcode#           | Qualified Read (N) | N with 10G (n) |
| Pol $\delta$ | 48                 | 216,737            | 210,080        | 49                 | 153,759            | 149,863        | 50                 | 66,491             | 64,946         | 60                 | 24,145             | 24,046         | 61                 | 43,070             | 42,724         |
| Pol $\delta$ |                    |                    |                |                    |                    |                |                    |                    |                | 63                 | 35,605             | 35,424         | 64                 | 19,399             | 19,208         |
| Pol $\eta$   | 19                 | 411,091            | 400,792        | 21                 | 56,446             | 55,159         | 26                 | 15,978             | 15,528         | 28                 | 10,056             | 10,004         | 30                 | 25,064             | 24,846         |
| Pol $\eta$   | 32                 | 17,989             | 17,661         | 34                 | 32,710             | 31,341         | 36                 | 23,196             | 22,579         | 38                 | 27,832             | 27,713         | 41                 | 11,124             | 10,968         |
| Pol $\eta$   |                    |                    |                |                    |                    |                |                    |                    |                | 43                 | 4,643              | 4,622          | 45                 | 5,445              | 5,391          |
| Pol $\zeta$  | 20                 | 56,948             | 56,126         | 25                 | 225,590            | 220,875        | 27                 | 79,807             | 77,450         | 29                 | 47,933             | 47,702         | 31                 | 67,407             | 66,561         |
| Pol $\zeta$  | 33                 | 49,059             | 48,074         | 35                 | 74,496             | 73,075         | 37                 | 89,395             | 86,783         | 39                 | 31,353             | 31,205         | 42                 | 16,456             | 15,787         |
| Pol $\zeta$  |                    |                    |                |                    |                    |                |                    |                    |                | 44                 | 10,430             | 10,379         | 47                 | 22,311             | 22,123         |
| No Pol       |                    |                    |                |                    |                    |                |                    |                    |                | 18                 | 452                | 57             |                    |                    |                |

| Control oligo without damage, no polymerase |          |                    |                |
|---------------------------------------------|----------|--------------------|----------------|
| Polymerase                                  | Barcode# | Qualified Read (N) | N with 10G (n) |
| No Pol                                      | 52       | 10,493             | NA             |

| Control oligo with AP, no polymerase |          |                    |                |
|--------------------------------------|----------|--------------------|----------------|
| Polymerase                           | Barcode# | Qualified Read (N) | N with 10G (n) |
| No Pol                               | 51       | 0                  | NA             |



**Table S4. Base-substitution rates on undamaged templates.**

Data obtained with type A to F templates were averaged after subtraction of background rates obtained in Pol-delta mediated reactions.

| Pol $\eta$                                             |    |          |          | Pol $\zeta$                                            |    |          |          |
|--------------------------------------------------------|----|----------|----------|--------------------------------------------------------|----|----------|----------|
| From                                                   | To | Avr (%)  | STD      | From                                                   | To | Avr (%)  | STD      |
| A                                                      | C  | 0.072001 | 0.231915 | A                                                      | C  | 0.018665 | 0.063343 |
| A                                                      | G  | 0.584463 | 0.339584 | A                                                      | G  | 0.043357 | 0.085708 |
| A                                                      | T  | 0.152433 | 0.152056 | A                                                      | T  | 0.019069 | 0.057238 |
| C                                                      | A  | 0.01706  | 0.017012 | C                                                      | A  | 0.072231 | 0.046962 |
| C                                                      | G  | 0.033472 | 0.044221 | C                                                      | G  | 0.212069 | 0.080492 |
| C                                                      | T  | 0.050209 | 0.032468 | C                                                      | T  | 0.035905 | 0.025726 |
| G                                                      | A  | 0.042319 | 0.026869 | G                                                      | A  | 0.058707 | 0.034413 |
| G                                                      | C  | 0.014348 | 0.038731 | G                                                      | C  | 0.011038 | 0.015567 |
| G                                                      | T  | 0.004897 | 0.015081 | G                                                      | T  | 0.01668  | 0.012629 |
| T                                                      | A  | 0.049124 | 0.029224 | T                                                      | A  | 0.090879 | 0.091182 |
| T                                                      | C  | 0.141028 | 0.310944 | T                                                      | C  | 0.02506  | 0.021895 |
| T                                                      | G  | 0.062356 | 0.050967 | T                                                      | G  | 0.079522 | 0.056363 |
| Total substitutions                                    |    | 1.22371  |          | Total substitutions                                    |    | 0.683184 |          |
| Mismatched template base<br>(% in total substitutions) |    |          |          | Mismatched template base<br>(% in total substitutions) |    |          |          |
| A-template base                                        |    | 20.63461 |          | A-template base                                        |    | 28.6103  |          |
| C-template base                                        |    | 5.030889 |          | C-template base                                        |    | 12.65033 |          |
| G-template base                                        |    | 8.232498 |          | G-template base                                        |    | 46.86967 |          |
| T-template base                                        |    | 66.102   |          | T-template base                                        |    | 11.8697  |          |
| Total Misinserted base<br>(% in total substitutions)   |    |          |          | Total Misinserted base<br>(% in total substitutions)   |    |          |          |
| A-Misinsert                                            |    | 8.866698 |          | A-misinsert                                            |    | 32.46823 |          |
| C-Misinsert                                            |    | 18.5809  |          | C-misinsert                                            |    | 8.015838 |          |
| G-Misinsert                                            |    | 55.59252 |          | G-Misinsert                                            |    | 49.02763 |          |
| T-Misinsert                                            |    | 16.95988 |          | T-Misinsert                                            |    | 10.4883  |          |
